# Supplementary material for: Identification and Characterization of a Novel Thermostable GDSL-Type Lipase from Geobacillus thermocatenulatus
Source: PubMed Central journal article supplement (PMC9706006; doi:10.4014/jmb.2012.12036), 2021-02-12
Supplement: jmb-31-3-483-supple.pdf [file jmb-31-3-483-supple.pdf]

Supplementary Table S1. Purification step of the recombinant Est29 and Lip29

|                   | Total activity<br>(U) <sup>a</sup> | Total protein<br>(mg) <sup>b</sup> | Specific activity<br>(U/mg) | Yield<br>(%) | Purification<br>(-fold) |
|-------------------|------------------------------------|------------------------------------|-----------------------------|--------------|-------------------------|
| Est29             |                                    |                                    |                             |              |                         |
| Cell-free extract | 96.3                               | 1505.1                             | 0.06                        | 100          | 1.0                     |
| Heat treatment    | 78.3                               | 388.2                              | 0.20                        | 81.4         | 3.2                     |
| Ni-NTA            | 1.2                                | 1.3                                | 0.92                        | 1.3          | 14.4                    |
| Lip29             |                                    |                                    |                             |              |                         |
| Cell-free extract | 36.7                               | 1087.0                             | 0.03                        | 100          | 1.0                     |
| Heat treatment    | 11.9                               | 293.1                              | 0.04                        | 32.5         | 1.2                     |
| Ni-NTA            | 2.1                                | 0.9                                | 2.27                        | 5.8          | 67.3                    |

<sup>a</sup>The activity unit is expressed as  $\mu\text{mol}/\text{min}$  with *p*NP-C16 as substrate.

<sup>b</sup>The amount of total protein was determined by the Bradford assay using BSA as a standard.
